# Supplementary material for: Characterizing seabed sediments at contrasting offshore renewable energy sites
Source: Frontiers journal article supplement (doi:10.3389/fmars.2023.1156486), 2023-04-04
Supplement: Table_1.XLSX [file Table_1.XLSX]

## Sheet: Sheet 1
	Sample Number	1	2	3	4	5	6	7	8	9	10	11	12	13	14	15	16	17	18	19	20	21	22	23	24	25	26	27	28	29	30	31	32	33	34	35	36
	Date (dd/mm/yyyy)	2021-06-03	2021-06-03	2021-06-03	2021-06-05	2021-06-05	2021-06-05	2021-06-05	2021-06-05	2021-06-05	2021-06-05	2021-06-05	2021-06-07	2021-06-07	2021-06-07	2021-06-08	2021-06-08	2021-06-09	2021-06-09	2021-06-10	2021-06-10	2021-06-10	2021-06-10	2021-06-12	2021-06-12	2021-06-12	2021-06-12	2021-06-12	2021-06-12	2021-06-12	2021-06-12	2021-06-12	2021-06-13	2021-06-13	2021-06-13	2021-06-13	2021-06-13
	Time (GMT)	09:12:00	10:46:00	14:26:00	11:47:00	11:47:00	12:06:00	12:06:00	12:21:00	12:21:00	12:31:00	12:31:00	06:04:00	08:20:00	14:40:00	08:15:00	09:44:00	10:20:00	13:14:00	07:46:00	08:55:00	10:10:00	17:08:00	04:35:00	05:45:00	06:55:00	07:05:00	13:44:00	14:54:00	16:10:00	17:21:00	18:29:00	06:29:00	07:39:00	08:17:00	09:25:00	10:10:00
	Latitude	53.3558	53.3591	53.3546	53.3537	53.3483	53.4086	53.4065	53.4048	53.4645	53.4615	53.4582	53.4572	53.4572	53.5149	53.515	53.5124	53.5127	53.5103	53.5152	53.5707	53.5675	53.5648	53.5615	53.6248	53.623	53.6197	53.6168	53.6134	53.6863	53.6863	53.6858	53.6858	53.6844	53.6844	53.6832	53.6832
	Longitude	-3.83248	-3.75458	-3.84785	-3.97595	-4.19325	-3.75128	-3.97477	-4.2022	-3.74345	-3.97532	-4.20612	-4.42863	-4.65188	-3.75934	-3.98159	-4.20879	-4.22717	-4.42895	-4.64887	-3.75005	-3.9766	-4.433	-4.6581	-3.75593	-3.98447	-4.22085	-4.44127	-4.66678	-4.83805	-4.83805	-4.8393	-4.8393	-4.83988	-4.83988	-4.84263	-4.84263
Sieve (phi)	Sieve Size (Microns)	Mass retained (g)																		Mass retained (g)
-6.25	75000	0	0	0	0	0	0	0	0	0	0	0	0	0	0	0	0	0	0	0	0	0	0	0	0	0	0	0	0	0	0	0	0	0	0	0	0
-6	63000	0	0	0	0	0	0	0	0	0	0	0	0	0	0	0	0	0	0	0	0	0	0	0	0	0	0	0	0	17.09	0	0	0	0	0	0	0
-5.75	53000	0	0	0	0	0	0	0	0	0	0	0	0	0	0	0	0	0	0	0	0	0	0	0	0	0	0	0	0	0	0	0	0	0	0	0	0
-5.5	45000	0	0	0	0	0	0	0	0	0	0	0	0	0	0	0	0	0	0	0	0	0	0	0	0	0	0	0	0	0	0	0	0	0	0	0	0
-5.25	37500	0	0	0	0	0	0	0	0	0	0	0	0	0	0	0	0	0	0	0	0	0	0	0	0	0	0	0	54.14	3.15	0	0	0	0	0	0	0
-5	31500	0	0	0	0	0	0	0	0	0	0	0	0	0	0	0	29.36	91.94	0	0	0	63.96	0	0	0	0	7.5	0	0	5.01	0	0	0	0	0	0	0
-4.75	26500	0	0	0	0	0	0	0	0	0	0	0	65.35	0	0	0	4.2	0	0	29.29	0	0	29.94	0	0	0	37.51	0	56.87	3.37	0	0	0	0	0	0	0
-4.5	22400	21.79	21.77	0	0	0	0	0	0	0	0	0	48.97	22.7	0	0	28.96	0	0	7.41	0	0	23.5	0	0	0	11.48	0.78	15.12	6.54	0	0	0	0	0	0	0
-4.25	19000	8.02	8.16	0	0	0	0	0	0	0	0	0	16.9	13.34	0	0	18.62	0	0	15.12	0	0	0	0	0	0	13.17	2.59	1.44	0.85	0	0	0	0	0	0	0
-4	16000	25.36	19.11	0	0	0	0	0	6.04	0	0	0	26.95	4.79	0	0	9.42	5.98	97.94	37.1	0	11.82	11.13	0	0	0	0	9.93	23.36	2.25	0	29	7.91	0	0	0	0
-3.75	13200	8.93	9.4	0	0	0	0	0	1.82	0	0.89	0	2.75	0.93	0	0	7.42	71.65	2.55	6.01	0	0	4.52	0	0	6.23	0.45	0.03	0	1.44	0	4.18	15.7	0	0	0	0
-3.5	11200	27.69	27.8	0	0	0	0	0	41.62	0	0.99	0	16.2	17.43	0	0	10.59	19.98	1.84	10.21	0	18.99	27.05	0	0	15.73	6.86	15.82	20.75	2.23	0	0.9	2.34	0	0	0	0
-3.25	9500	0	7.05	0	0	0	0	0	12.1	0	0	0	1.88	0	0	0	2	2.3	0.17	0.28	0	2.01	3.58	0	0	1.53	0.29	4.12	1.34	3.63	0	0	0.81	0	0	0	0
-3	8000	9.76	10.94	0	0	0	0	0	21.89	0	1.47	0	10.87	7.64	0	0	3.97	3.45	1.87	8.79	0	7.56	7.8	0	0	10.71	1.93	10.76	7.52	2.44	0	2.97	10.61	0	0	0	0
-2.75	6700	10.6	14.65	0	0	0	0	0	27.55	0	2.24	0	11.4	7.48	0	0	13.58	5.4	8.54	8.85	0	9.73	15.85	0	0	19.28	8.3	16	7.3	2.16	0	10.47	16.84	0	0	0	0
-2.5	5600	9.06	8.98	0	0	0	0	0	17.15	0	2.19	0	9.37	6.47	0	0	8.39	3.89	3.46	7.88	0	4.52	16.65	0	0	8.51	4.08	8.89	5.93	2.02	0	5.37	9.75	0	0	0	0
-2.25	4750	6.65	8.1	0	0	0	0	0	11.5	0	4.54	0	10.15	4.82	0	0	5.94	4.01	5.44	7.81	0	5.69	11.82	0	0	9.73	6.01	8.45	5.67	0.97	0	2.77	8.48	0	0	0	0
-2	4000	10.26	10	0	0	0	0	0	14.58	0	4.81	0	12.03	6.92	0	0	6.95	5.3	8.95	7.89	0	4.11	14.34	0	0	11.38	4.93	10.47	8.15	2.78	0	5.86	9.32	0	0	0	0
-1.75	3350	7.64	6.05	0	0	0	0	0	10.76	0	4.77	0	11.82	5.5	0	0	7.39	7.35	8.66	7.83	0	2.75	15.39	0	0	14.99	9.29	11.15	6.59	2.17	0	4.83	10.33	0	0	0	0
-1.5	2800	6.96	5.88	0	0	0	0	0	9.91	0	5.14	0	8.25	4.14	0	0	6.36	9.64	8.72	7.89	0	2.41	15.49	0	0	11.64	6.76	8.92	5.44	3.19	0	5.35	7.41	0	0	0	0
-1.25	2360	5.28	4.6	0	0	0	0	0	6.57	0	5.39	0	7.94	3.99	0	0	4.9	9.77	9.73	3.98	0	2.77	6.35	0	0	12.33	5.85	7.21	4.8	6.41	0	5.18	8.71	0	0	0	0
-1	2000	4.02	2.94	10.14	0.28	0.07	9.06	24.05	5.1	7.65	4.01	15.83	6.09	3.42	11.57	115.2	4.23	6.74	7.31	7.58	56.01	2.18	6.1	36.42	21.13	10.06	4.26	5.62	4.46	21.18	39.77	4.81	6.61	58.72	57.92	34.24	34.56
-0.75	1700	1.53	0.14	0.94	0.03	0	0.06	0.33	2.41	0.59	2.54	0.35	2.56	2.05	1.25	4.3	1.25	3.18	3.62	2.12	5.29	1.78	3.86	1.16	2.51	4.54	0.46	3.49	1.73	12.07	1.05	2.41	2.25	7.76	8.63	1.89	1.29
-0.5	1400	4.89	2.22	2.69	0.15	0.41	0.47	0.99	6.9	2.63	8.5	0.76	8.13	6.02	3.33	14.43	4.92	10.18	9.63	7.3	14.28	4.66	8.45	3.83	13.03	13.02	2.44	9.74	6	25.86	2.6	6.43	8.83	25.66	22.49	5.24	3.69
-0.25	1180	2.11	1.08	1.7	0.12	0.21	0.24	0.32	4.16	1.95	4.3	0.43	4.25	4.63	2.58	11.09	2.93	5.63	5.45	4	10.88	3.8	4.22	2.24	7.89	7.38	9.49	6.51	3.8	23.43	2.16	4.46	6.01	14.88	16.06	3.98	2.57
0	1000	2.38	1.37	1.88	0.05	0.2	0.28	0.25	4.12	2.28	5.81	0.29	3.85	4.15	3.66	8.72	3.47	4.72	5.17	4.16	9.07	4.1	3.93	2.51	13.79	6.77	7.54	6.54	4.54	12.33	2.99	5.7	6.83	19.59	19.45	5.08	3.83
0.25	850	2.28	1.11	1.96	0.05	0.36	0.26	0.19	4.98	3.43	5.28	0.39	5.46	4.49	5.48	6.49	3.54	5.79	5.18	3.46	16.33	4.85	3.91	2.45	18.87	15.46	17.9	8.94	4.74	7.99	6.05	8.3	10.26	37.24	42.97	16.92	10.99
0.5	710	2.87	1.27	2.8	0.15	0.77	0.38	0.23	6.74	5.17	7.11	0.48	19.3	4.11	13.45	5.43	5.35	5.78	6.16	4.8	20.19	7.79	5.27	2.42	31.63	22.7	16.12	9.3	5.58	4.76	16.76	17.55	19.67	36.39	36.25	41.92	34.26
0.75	600	3.15	1.31	4.36	0.34	1.45	0.55	0.37	7.83	12.26	7.66	0.41	36.02	3.65	12.53	4.9	6.36	5.7	6.14	4.91	13.13	9.51	5.9	3.62	42.27	25.26	34.93	7	5.52	3.03	17.08	13.14	17.97	13.04	11.49	42.64	29.38
1	500	6.18	1.8	7.75	0.44	3.99	1.58	1.06	14.58	74.26	8.65	0.79	77.67	5.44	28.92	8.79	10.05	7	9.96	7.31	24.25	14.11	10.16	3.97	41.63	35.1	32.32	13.07	7.87	2.96	24.11	19.59	22.43	5.23	4.46	28.22	24.81
1.25	425	11.29	1.57	11.41	1.26	7.6	4.01	1.93	9.91	65.71	11	1.32	30.7	3.4	33.09	14.69	12.14	5.91	9.65	5.59	16.82	9.24	20.11	8.06	31.67	21.63	27.98	13.79	11.26	2.5	28.27	26.55	43.41	1.7	1.57	17.28	13.97
1.5	355	20.13	3.14	23.29	2.25	63.81	93.35	18.46	24.68	40.11	22.19	10.11	13.38	2.24	37.56	42.87	22.82	6.27	10.86	5.29	29.75	8.58	30.38	11.91	16.81	42.05	12.75	18.59	20.56	1.63	15.9	17.24	9.91	0.72	0.68	12.19	12.12
1.75	300	19.53	9.92	53	25.53	121.65	271.76	110.2	16.73	12	31.71	52.77	7.17	0.96	39.45	56.63	14.01	4.6	9.32	3.94	63.05	8.74	10.04	6.5	24.4	64.59	7.28	23.56	21.12	1.03	9.26	8.29	7.88	0.11	0.17	7.44	9.17
2	250	14.83	21.78	67.12	100.25	34.14	39.44	76.8	8.63	4	26.8	17.78	4.35	0.58	15.97	20.94	10.58	2.49	5.61	2.64	21.09	8.53	19.33	1.95	16.83	19.14	7.43	11.22	13.62	1.15	7.3	6.62	5	0.06	0.11	6.08	6.64
2.25	212	8.34	25.33	66.82	30.37	40.38	20.24	71.31	9.83	1.21	15.52	34.63	2.02	0.33	15.91	18.25	5.51	1.18	2.69	1.06	39.05	4.18	11.45	1.03	9.82	23.98	13.2	8.04	7.72	1.25	5.13	4.5	3.57	0.1	0.11	5.17	4.91
2.5	180	2.38	13.32	34.04	53.22	24.24	7.73	36.32	7.06	0.42	10.68	21.6	0.82	0.21	9.32	11.36	2.26	0.59	1.33	0.34	30.17	2.43	5.76	0.5	9.53	15.03	9.08	6.69	5.58	1.06	4.72	3.5	1.69	0.11	0.22	3.54	3.52
2.75	150	0.78	3.25	9.96	30.82	15.77	2.15	11.6	5.06	0.13	7.82	6.62	0.39	0.18	4.08	7.05	0.83	0.29	0.83	0.19	11.56	1.19	2.09	0.15	2.19	11.11	4.06	4.16	3.45	2.5	4.01	1.9	1.06	0.08	0.17	1.7	1.54
3	125	0.32	0.82	2.66	7.88	13.24	0.56	2.02	2.87	0.09	3.53	1.02	0.18	0.13	1.88	2.98	0.35	0.25	0.55	0.09	4.16	0.47	0.9	0.08	0.6	5.26	2.71	1.67	1.74	1.63	2.44	0.82	0.39	0.03	0.11	0.71	0.51
3.25	106	0.2	0.38	1.19	1.52	10.26	0.24	0.5	1.86	0.02	1.79	0.23	0.15	0.08	1.03	1.36	0.2	0.1	0.43	0.07	2.11	0.27	0.63	0.08	0.31	2.54	1.42	0.99	0.9	1.03	1.61	0.45	0.42	0.07	0.1	0.4	0.23
3.5	90	0.16	0.28	0.88	0.52	5.56	0.19	0.26	1.35	0.02	1.34	0.14	0.11	0.08	0.82	1.04	0.17	0.12	0.48	0.04	1.75	0.24	0.6	0.06	0.15	1.44	0.62	0.9	0.89	1.15	1.79	0.53	0.12	0.03	0.17	0.54	0.21
3.75	75	0.19	0.44	0.82	0.26	2.72	0.14	0.14	0.99	0.01	1	0.09	0.2	0.06	0.63	0.74	0.19	0.11	0.55	0.07	1.06	0.25	0.69	0.02	0.16	0.81	0.37	0.99	0.94	1.25	1.84	0.57	0.03	0.08	0.12	0.51	0.22
4	63	0.15	0.18	0.39	0.3	1.29	0.12	0.07	0.56	0.02	0.59	0.05	0.17	0.05	0.46	0.19	0.12	0.1	0.33	0.02	0.54	0.17	0.47	0.03	0.1	0.26	0.19	0.71	0.6	1.06	1.48	0.43	0.05	0.05	0.08	0.32	0.29
Pan	Pan	0.87	0.57	0.4	0.21	1.15	0.05	0.06	0.59	0.8	0.52	0.18	0.11	0.02	0.42	0.12	0.1	0.13	0.35	0.02	0.16	0.07	0.35	0.01	0.02	0.1	0.09	0.53	0.43	0.22	1.1	0.55	0.04	0.03	0.05	0.26	0.02
	Fines (Evaporate)	0.82	5.8	8.85	0.24	7.74	0.6	0.29	9.49	0.063	4.22	3.18	1.79	0.98	5.74	14.29	2.29	2.29	7.89	0.47	4.34	2.76	3.35	0.48	3.1	13.06	0.87	32.93	0.18	2.33	4.74	1.91	2.95	0.18	1.89	3.48	1.24
	Pan + Fine	1.69	6.37	9.25	0.45	8.89	0.65	0.35	10.08	0.863	4.74	3.36	1.9	1	6.16	14.41	2.39	2.42	8.24	0.49	4.5	2.83	3.7	0.49	3.12	13.16	0.96	33.46	0.61	2.55	5.84	2.46	2.99	0.21	1.94	3.74	1.26
	Total Mass (g)	267.63	262.87	316.24	256.4	357.84	453.48	358.98	339.6	235.743	228.42	169.89	486.28	154.87	249.13	374.78	381.84	321.09	267.38	231.97	396.54	238.1	363.12	90.15	309.65	486.66	337.99	311.4	359.28	193.61	202.45	234.92	286.34	222.49	225.75	244.76	201.01
